# Supplementary material for: Identification of histone 3 variant 2 interacting factors
Source: PubMed Central journal article supplement (PMC3973350; doi:10.1093/nar/gkt1355), 2014-01-06
Supplement: supp_gkt1355_nar-02103-m-2013-File003.pdf [file supp_gkt1355_nar-02103-m-2013-File003.pdf]

## Peptide Coverage

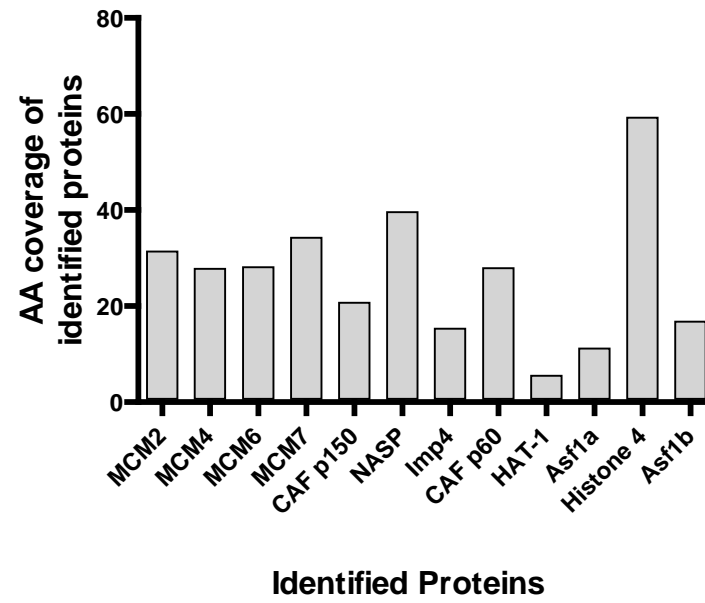

## **Supplementary Figure Legend**

**Supplementary Figure 1.** Peptide coverage of eH3.2 partners identified by mass spectrometry. Identification of eH3.2 interacting factors. Shown is percent coverage of peptides identified by mass spectrometry.
